# Supplementary material
Source: HighWire-hosted journal article supplement (https://jnm.snmjournals.org/highwire/filestream/103720/field_highwire_adjunct_files/0/261925_Supplemental_Data.pdf)
Supplement: 261925_Supplemental_Data.pdf [file 261925_Supplemental_Data.pdf]

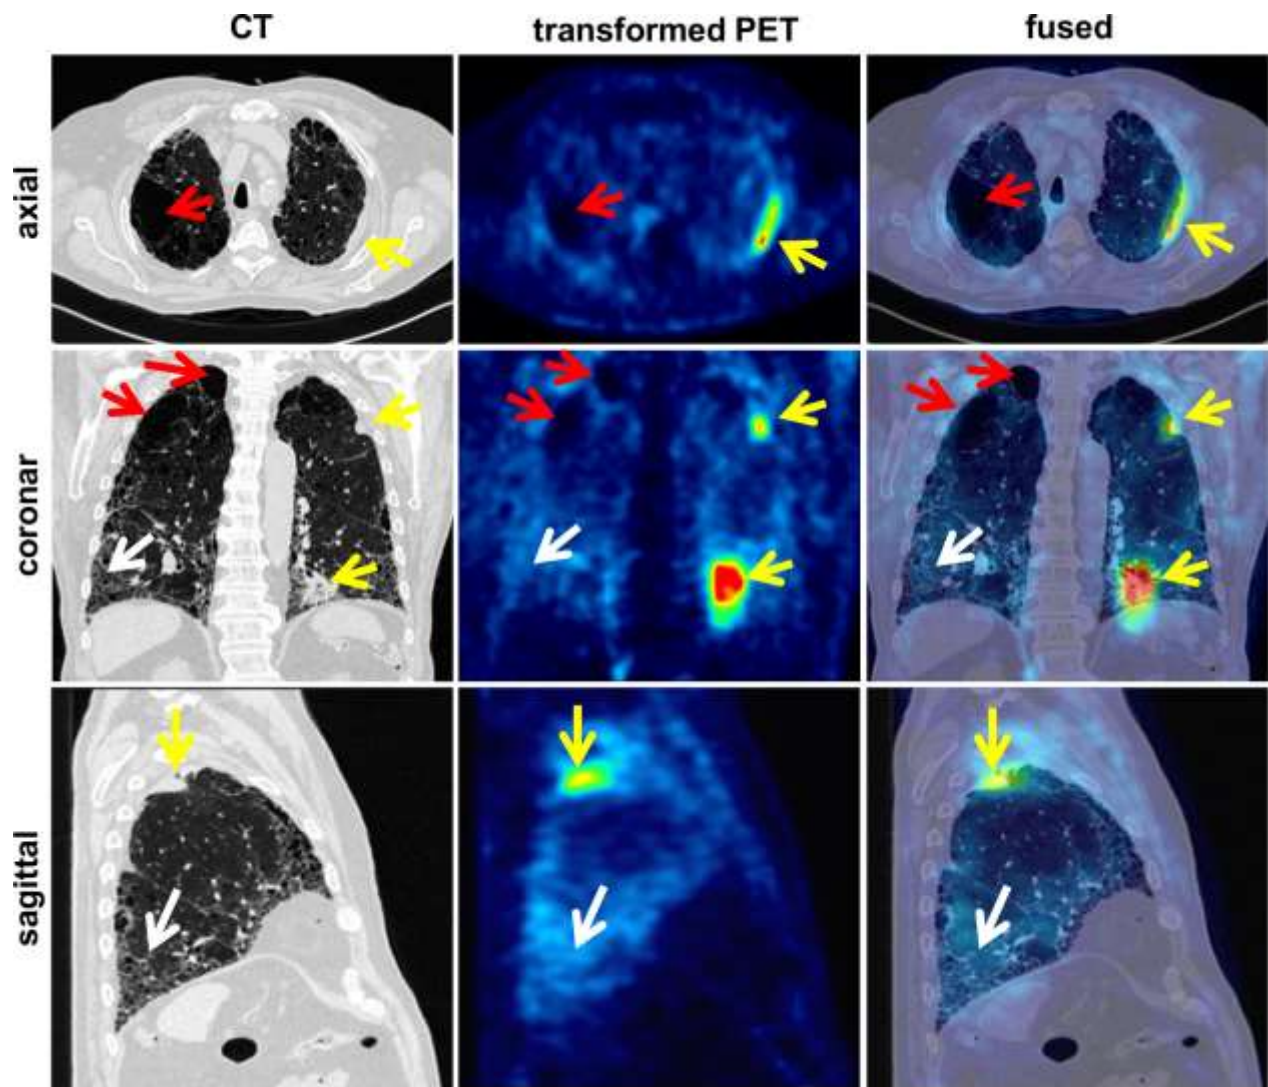

**Supplemental figure 1:** Representative example of the performed intermodal co-registration of CT and FAPI-PET images. The intensively FAPI-positive tumor manifestations (yellow arrows) located in the basal left lung and on the pleura of the left upper lobe, moderately FAPI-positive fibrotic areas (white arrows) in the basal parts of both lungs and the photopenia of bullae in the apical right lung serve as visual landmarks. Intermodal co-registration leads to identical volumes that allow the comparison of PET- and CT-based parameters.

### Background Activity (SUVmax and SUVmean density corrected)

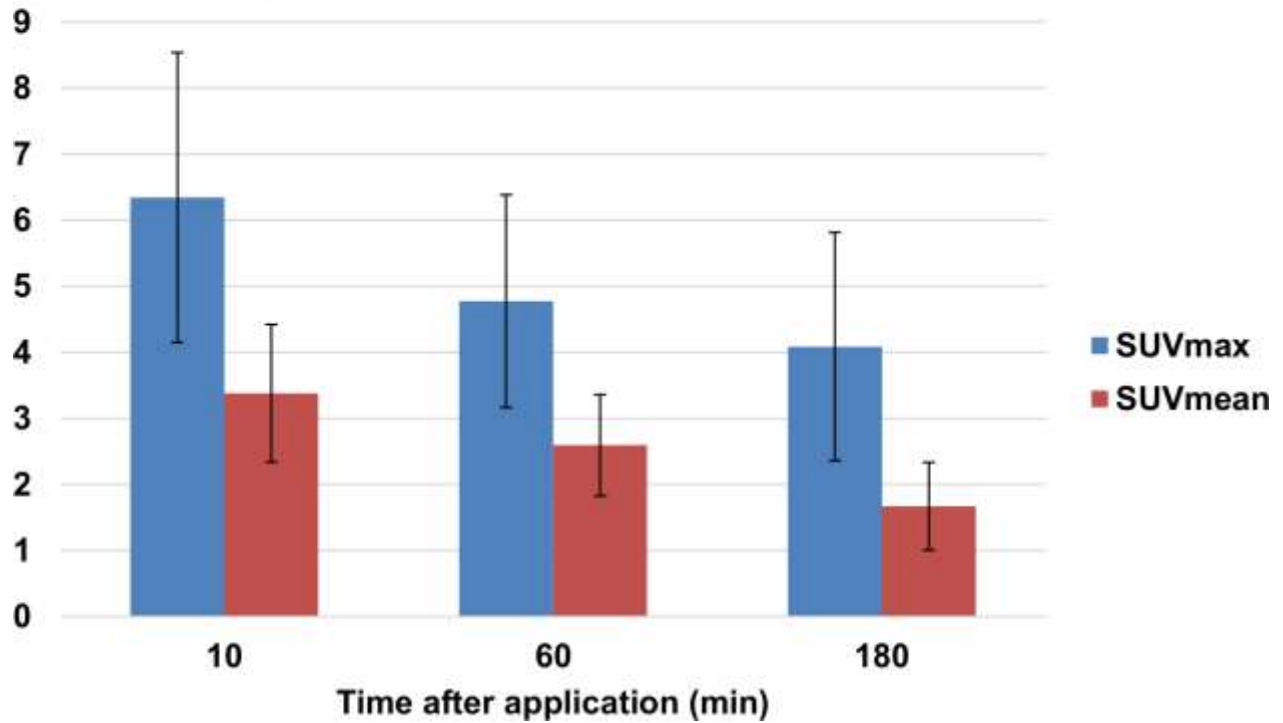

**Supplemental figure 2:** Average density corrected SUVmax and SUVmean values +/- standard deviation for healthy appearing lung parenchyma in 15 patients 10, 60 and 180 minutes after application of FAPI-46, representing the background activity regarding FAPI-46 uptake.

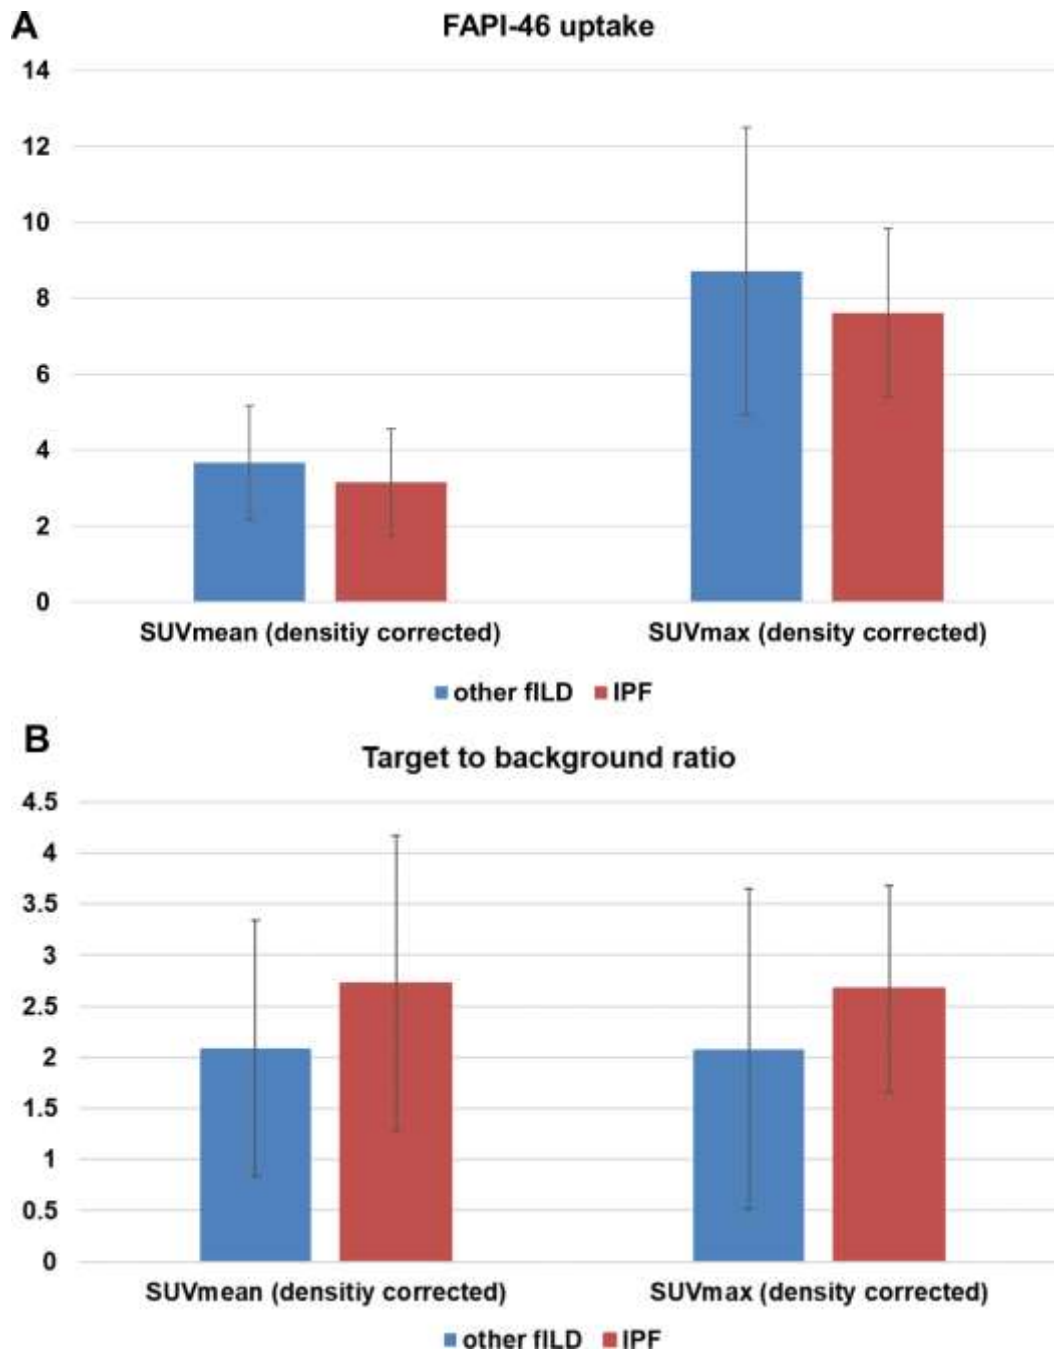

**Supplemental figure 3:** Comparison of density corrected FAPI-46 uptake (SUVmean and SUVmax) (**A**) and corresponding TBR (**B**) of IPF and other fILDs. We measured the following parameters: Average SUVmean: 3.15 +/- 1.41 (IPF) versus 3.67 +/- 1.50 (other fILD), p-value 0.23, average SUVmax 7.61 +/- 2.22 (IPF) versus 8.71 +/- 3.79 (other fILD), p-value 0.19, average TBR (SUVmean) 2.73 +/- 1.45 (IPF) versus 2.08 +/- 1.25 (other

fILD), p-value 0.13 and average TBR (SUVmax) 2.67 +/- 1.01 (IPF) versus 2.08 +/- 1.57 (other fILD), p-value 0,10.

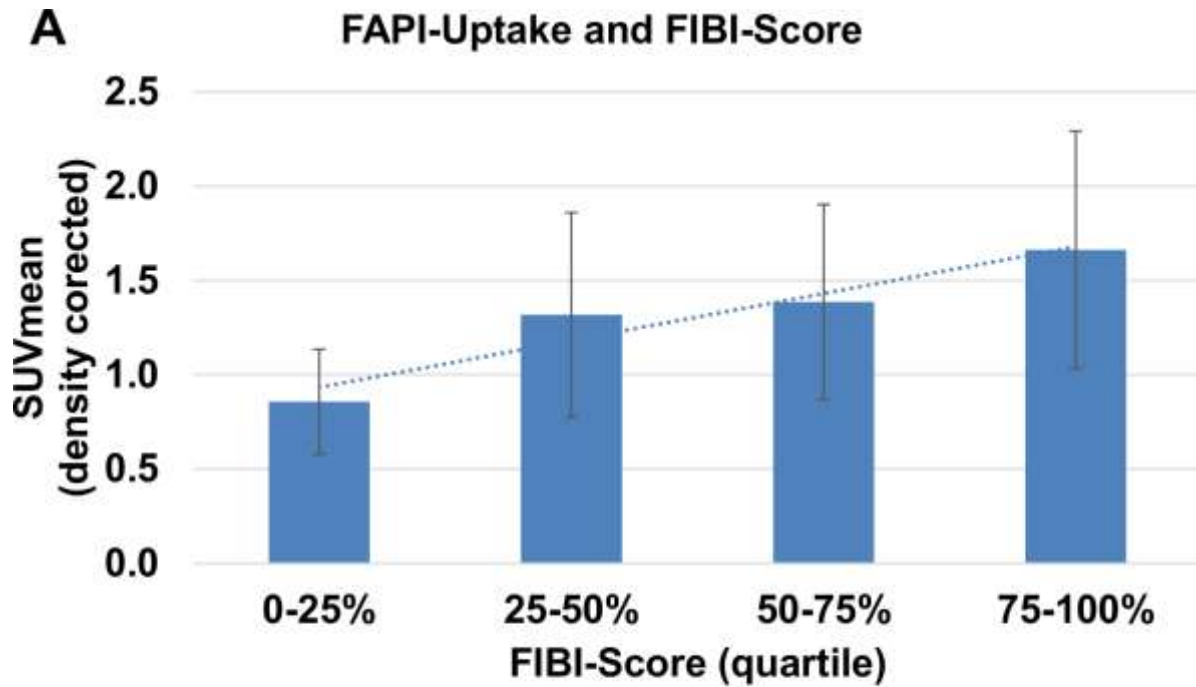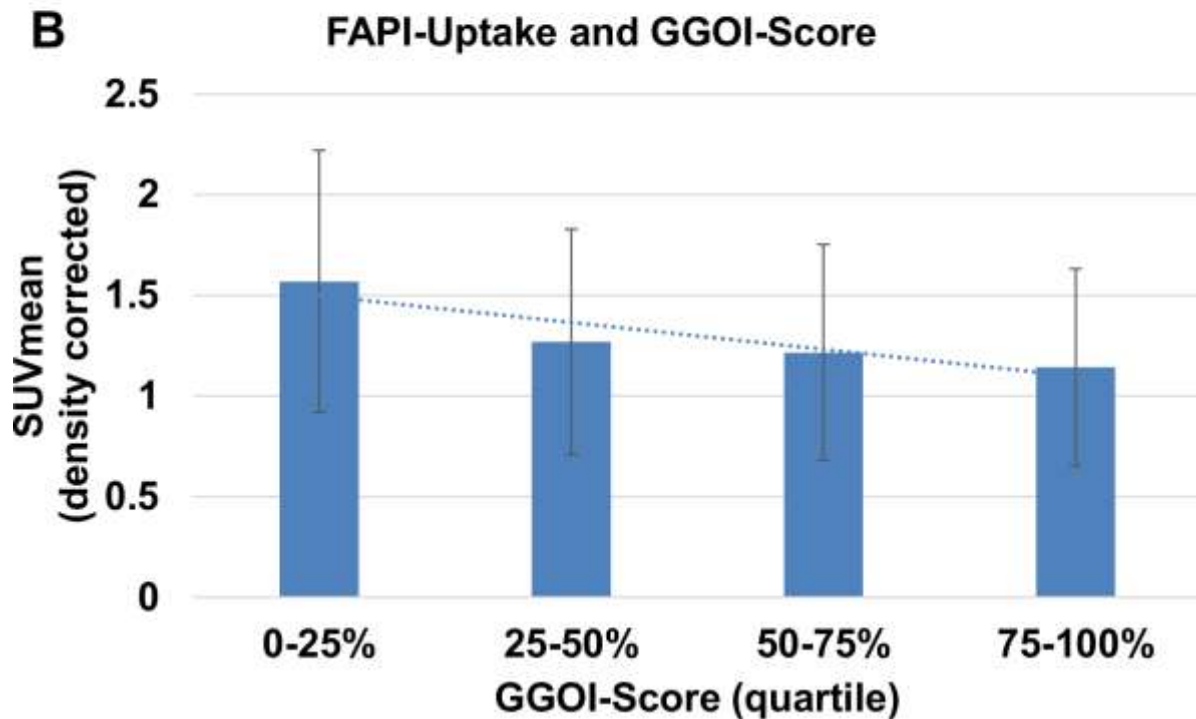

**Supplemental figure 4:** Quartile-wise correlation analysis of FAPI-46 uptake (density corrected SUVmean values) and FIB (A) /GGO (B) indices in 75 lobes.

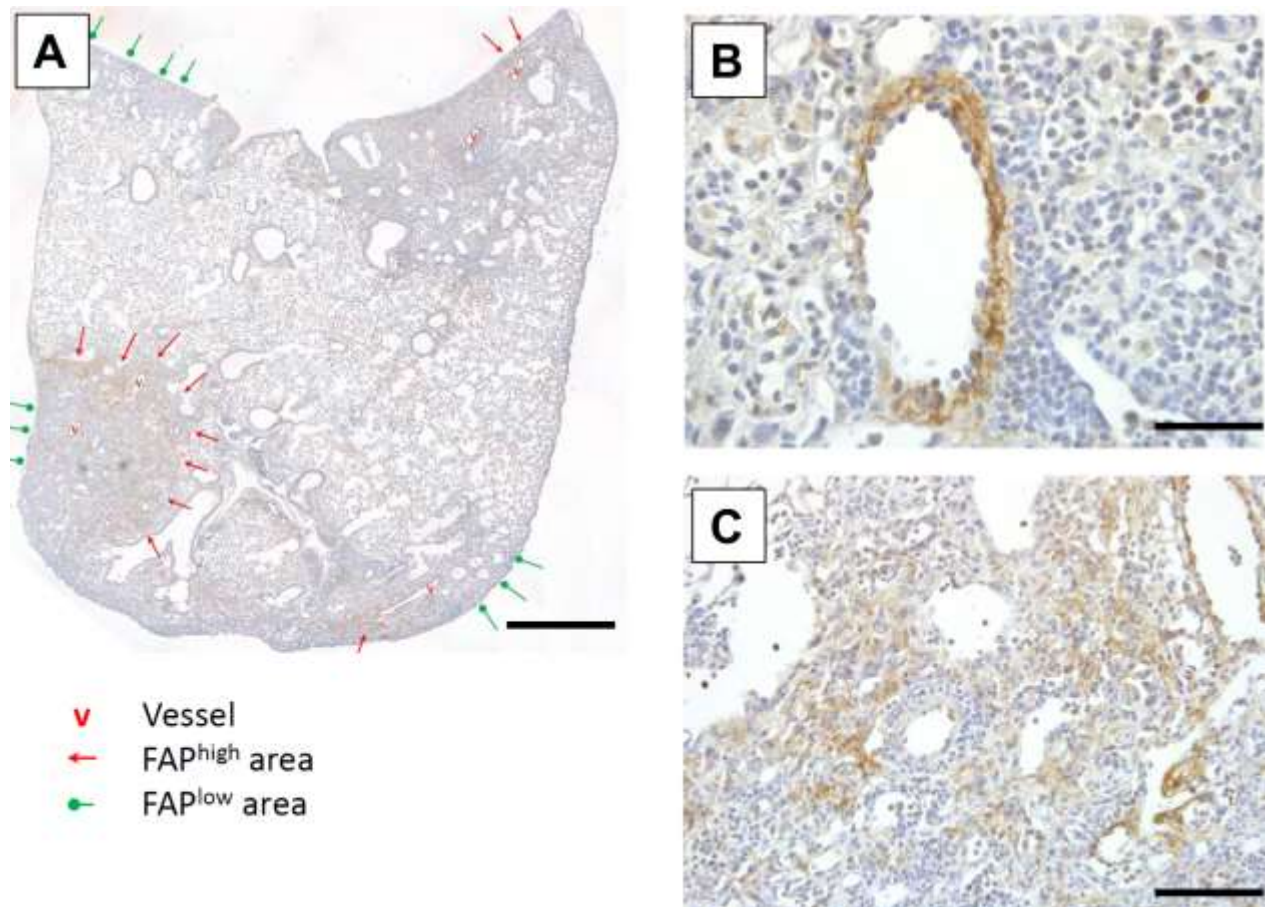

**Supplemental figure 5:** **A** Exemplary whole lung section of a *Nedd4-2*<sup>-/-</sup> mouse suffering from IPF-like lung disease immunohistochemically stained for FAP. Red arrows indicate areas with high FAP expression, green arrows indicate areas with low FAP expression. V=blood vessel. Scalebar = 1000  $\mu$ m. **B** Exemplary image of perivascular FAP-positive cells. Scalebar = 50  $\mu$ m. **C** Exemplary image of parenchymal FAP-positive cells. Scalebar = 100  $\mu$ m.

| Supplemental Table 1: Clinical features and imaging protocols of 15 ILD patients with suspected lung cancer |     |     |                |                                  |             |                                                |                             |                                |         |                               |
|-------------------------------------------------------------------------------------------------------------|-----|-----|----------------|----------------------------------|-------------|------------------------------------------------|-----------------------------|--------------------------------|---------|-------------------------------|
| No.                                                                                                         | Age | Sex | FVC            | DLCO                             | ILD Subtype | Biopsy technique                               | ILD pattern                 | LC Subtype                     | Tracer  | Image acquisition p.i.        |
| 1                                                                                                           | 59  | f   | 2,01 l (62,7%) | DLCO/SB 36,1 %<br>DLCO/VA 61,3%  | DIP         | none                                           |                             | NSCLC (SCC)                    | FAPI-46 | 10,60,180 Min.                |
| 2                                                                                                           | 75  | m   | 1,05 l (37,8%) | DLCO/SB 131,4%<br>DLCO/VA 102,6% | RA-ILD      | Surgical Biopsy                                | NSIP                        | NSCLC (SCC)                    | FAPI-46 | 10,60,180 Min.                |
| 3                                                                                                           | 69  | m   | 2,13 l (51,7%) | DLCO/SB 21,6%<br>DLCO/VA 39,9%   | RA-ILD      | none                                           |                             | NSCLC (SCC)                    | FAPI-46 | 10,60,180 Min.                |
| 4                                                                                                           | 69  | f   | 1,79 l (69,8%) | DLCO/SB 51,5%<br>DLCO/VA 75,6%   | IPF         | VATS and atypical resection of segments 2,9,10 | UIP                         | LC not proven                  | FAPI-46 | 10,60,180 Min.                |
| 5                                                                                                           | 78  | f   | 1,87 l (71,8%) | DLCO/SB 19,6 %<br>DLCO/VA 30,6 % | SSc-ILD     | Bronchoscopy                                   | unspecific                  | LC not proven                  | FAPI-46 | 10,60,180 Min.                |
| 6                                                                                                           | 56  | m   | 1,96 l (42%)   | DLCO/SB 26,7%<br>DLCO/VA 56,7%   | uILD        | Surgical Biopsy                                | UIP                         | NSCLC (AC)                     | FAPI-46 | 10,60,180 Min.                |
| 7                                                                                                           | 70  | m   | 2,66 l (66,3%) | DLCO/SB 32%<br>DLCO/VA 54,2%     | IAPAF       | none                                           |                             | NSCLC (AC)                     | FAPI-46 | 10,60,180 Min.                |
| 8                                                                                                           | 76  | m   | 2,33 l (66,6%) | DLCO/SB 36,6%<br>DLCO/VA 66,6%   | IPF         | none                                           |                             | NSCLC (SCC)                    | FAPI-46 | 10,60,180 Min.                |
| 9                                                                                                           | 71  | f   | 1,58 l (55,5%) | DLCO/SB 28,1%                    | IPF         | Surgical Biopsy                                | UIP                         | NSCLC (AC)                     | FAPI-46 | 10,60,180 Min.                |
| 10                                                                                                          | 78  | m   | 2,81 l (75,3%) | DLCO/VA 47,9%                    | IPF         | Bronchoscopy                                   | UIP                         | LC not proven                  | FAPI-46 | 10,60,180 Min.                |
| 11                                                                                                          | 74  | m   | 3,07 l (80%)   | DLCO/SB 28,2%<br>DLCO/VA 45,4%   | IPF         | none                                           |                             | NSCLC (SCC)                    | FAPI-46 | 10,60,180 Min.                |
| 12                                                                                                          | 77  | m   | 2,55 l (81,6%) | DLCO/SB 49,9%<br>DLCO/VA 69,2%   | IPF         | 1. Bronchoscopy<br>2. Surgical Biopsy          | NSIP<br>transition NSIP/UIP | SCLC                           | FAPI-46 | 10,60,180 Min.                |
| 13                                                                                                          | 80  | m   | 2,46 l (77,9%) | DLCO/SB 19,1%<br>DLCO/VA 33,1%   | CPFE        | none                                           |                             | NSCLC (subtype not determined) | FAPI-46 | dynamic 60 min. + 60,180 Min. |
| 14                                                                                                          | 65  | m   | 4,04 l (88,6%) | DLCO/SB 36,3%<br>DLCO/VA 50,4%   | IAPAF       | none                                           |                             | NSCLC (SCC)                    | FAPI-46 | dynamic 60 min. + 60,180 Min. |

|                                                                                                                                                                                                                                                                                                                                                                                                                                                                                                                                                                                                                                                                                                                                                                                                                 |    |   |                |                              |             |     |                               |               |         |                               |
|-----------------------------------------------------------------------------------------------------------------------------------------------------------------------------------------------------------------------------------------------------------------------------------------------------------------------------------------------------------------------------------------------------------------------------------------------------------------------------------------------------------------------------------------------------------------------------------------------------------------------------------------------------------------------------------------------------------------------------------------------------------------------------------------------------------------|----|---|----------------|------------------------------|-------------|-----|-------------------------------|---------------|---------|-------------------------------|
| 15                                                                                                                                                                                                                                                                                                                                                                                                                                                                                                                                                                                                                                                                                                                                                                                                              | 71 | m | 3,54 l (96,5%) | DLCO/SB 49%<br>DLCO/VA 62,5% | Sarcoidosis | TBB | epithelioid cell<br>granuloma | LC not proven | FAPI-46 | dynamic 60 min. + 60,180 Min. |
| <p>Abbreviations: FVC = Forced Vital Capacity, DLCO = Diffusing Capacity of the Lung for Carbon Monoxide, VA = Alveolar Volume, SB = Single Breath, DIP = Desquamative Interstitial Pneumonia, RA-ILD = Rheumatoid Arthritis associated Interstitial Lung Disease, IPF = Idiopathic Pulmonary Fibrosis, IPAF = Interstitial Pneumonia with autoimmune Features, SSc-ILD = Systemic Sclerosis associated Interstitial Lung Disease, CPFE = Combined Pulmonary Fibrosis and Emphysema, uILD = unclassifiable Interstitial Lung Disease, LC = Lung Cancer, NSCLC = Non Small Cell Lung Cancer, SCC = Squamous Cell Carcinoma, AC = Adenocarcinoma, SCLC = Small Cell Lung Cancer, NSIP = Non Specific Interstitial Pneumonia , VATS = Video Assisted Thoracoscopic Surgery, UIP = Usual Interstitial Pneumonia</p> |    |   |                |                              |             |     |                               |               |         |                               |

| Supplemental table 2: density corrected SUV values and target to background ratios (TBR) off 55 fibrotic lesions in 15 patients with various fILD |                                 |                         |             |                                |          |                         |            |                                |            |                         |            |                                |            |
|---------------------------------------------------------------------------------------------------------------------------------------------------|---------------------------------|-------------------------|-------------|--------------------------------|----------|-------------------------|------------|--------------------------------|------------|-------------------------|------------|--------------------------------|------------|
| Patient number                                                                                                                                    | Localization of fibrotic lesion | 10 minutes p.i.         |             |                                |          | 60 minutes p.i.         |            |                                |            | 180 minutes p.i.        |            |                                |            |
|                                                                                                                                                   |                                 | SUV (density corrected) |             | TBR (density corrected values) |          | SUV (density corrected) |            | TBR (density corrected values) |            | SUV (density corrected) |            | TBR (density corrected values) |            |
|                                                                                                                                                   |                                 | SUVmean                 | SUVmax      | SUVmean                        | SUVmax   | SUVmean                 | SUVmax     | SUVmean                        | SUVmax     | SUVmean                 | SUVmax     | SUVmean                        | SUVmax     |
| 1                                                                                                                                                 | RUL                             | 4.122470696             | 11.68574119 | 1.962224862                    | 1.878182 | 3.88601749              | 10.2274065 | 1.81111161                     | 2.62232856 | 0.74793642              | 2.01383798 | 3.87317147                     | 3.72297669 |
|                                                                                                                                                   | RML                             | 4.844485338             | 12.35688173 | 2.305891363                    | 1.986051 | 3.45704153              | 9.09536535 | 1.61118371                     | 2.33207082 | 0.74793642              | 2.01383798 | 2.75963467                     | 1.96869448 |
|                                                                                                                                                   | RLL                             | 4.564995799             | 11.88313546 | 2.172859169                    | 1.909908 | 3.22993662              | 7.53392924 | 1.50533952                     | 1.93171531 | 0.74793642              | 2.01383798 | 4.35731791                     | 3.31364417 |
|                                                                                                                                                   | LUL                             | 4.937648518             | 12.63323372 | 2.350235428                    | 2.030467 | 3.20470274              | 8.431755   | 1.49357906                     | 2.16191973 | 0.74793642              | 2.01383798 | 4.35731791                     | 3.39161227 |
|                                                                                                                                                   | LLL                             | 4.774612953             | 12.19896631 | 2.272633315                    | 1.96067  | 3.93648525              | 9.13440125 | 1.83463254                     | 2.3420797  | 0.74793642              | 2.01383798 | 4.06683005                     | 2.86532761 |
| 2                                                                                                                                                 | RML                             | 4.218142096             | 7.990471321 | 1.024096326                    | 1.046341 | 3.36164571              | 5.49113451 | 1.53564214                     | 1.57947595 | 1.07581006              | 2.4313868  | 3.15516662                     | 2.2307032  |
|                                                                                                                                                   | RLL                             | 4.063550501             | 7.717504909 | 0.986564                       | 1.010597 | 6.63304589              | 11.2329017 | 3.03005899                     | 3.23104416 | 1.07581006              | 2.4313868  | 7.08619388                     | 5.30651862 |
|                                                                                                                                                   | LLL                             | 4.151888555             | 6.104521568 | 1.008011043                    | 0.799379 | 4.19641679              | 5.71898241 | 1.9169761                      | 1.64501437 | 1.07581006              | 2.4313868  | 3.80171715                     | 2.4468947  |
| 3                                                                                                                                                 | RUL                             | 3.570303325             | 12.68122241 | 0.679657308                    | 1.211729 | 3.32133585              | 10.8222836 | 0.85046987                     | 1.37560588 | 2.58955338              | 4.913906   | 0.95352522                     | 1.05556319 |
|                                                                                                                                                   | RML                             | 4.168285163             | 15.58733588 | 0.793491537                    | 1.489417 | 4.55946696              | 10.7526869 | 1.16750893                     | 1.36675954 | 2.58955338              | 4.913906   | 1.33493531                     | 1.63237368 |
|                                                                                                                                                   | RLL                             | 5.680827458             | 17.56877688 | 1.081425174                    | 1.67875  | 3.65543472              | 8.83877826 | 0.93602009                     | 1.12348519 | 2.58955338              | 4.913906   | 1.10450005                     | 1.48817106 |
|                                                                                                                                                   | LUL                             | 3.81653114              | 13.47379881 | 0.726530225                    | 1.287462 | 3.55717035              | 9.46514838 | 0.91085826                     | 1.20310225 | 2.58955338              | 4.913906   | 1.15217631                     | 1.46509864 |
|                                                                                                                                                   | LLL                             | 3.939645048             | 16.11572014 | 0.749966684                    | 1.539906 | 3.45890597              | 10.0219218 | 0.88569643                     | 1.27387297 | 2.58955338              | 4.913906   | 1.13628422                     | 1.44779432 |
| 4                                                                                                                                                 | RLL                             | 4.046722708             | 17.69396194 | 1.745970137                    | 5.000369 | 8.99848214              | 33.6942833 | 5.49016394                     | 11.0113775 | 1.22178188              | 2.55056305 | 6.91754103                     | 10.2353397 |
|                                                                                                                                                   | LUL                             | 3.139698653             | 9.475269445 | 1.354632003                    | 2.677741 | 3.70940565              | 12.8344861 | 2.2631867                      | 4.1943427  | 1.22178188              | 2.55056305 | 3.38303102                     | 4.24241446 |
| 5                                                                                                                                                 | RLL                             | 4.661628294             | 14.03888644 | 1.722838235                    | 3.190291 | 2.01690117              | 6.46232909 | 1.23055399                     | 2.11190558 | 1.22178188              | 2.55056305 | 1.57790626                     | 2.18298997 |
|                                                                                                                                                   | LLL                             | 4.747162759             | 13.30608742 | 1.754449946                    | 3.023765 | 4.00688272              | 10.1268618 | 1.69779912                     | 1.48192986 | 1.40804307              | 3.79921345 | 1.85937706                     | 1.96582597 |
| 6                                                                                                                                                 | RML                             | 5.891261082             | 13.57279944 | 1.472390695                    | 2.156954 | 4.58927846              | 12.0557879 | 1.94457224                     | 1.76420221 | 1.40804307              | 3.79921345 | 2.78906559                     | 2.72594534 |
|                                                                                                                                                   | RLL                             | 5.917918372             | 15.14353884 | 1.479053096                    | 2.406572 | 3.38248143              | 8.97847767 | 1.00078445                     | 2.13094315 | 1.98725405              | 3.66242613 | 1.30629885                     | 1.79627981 |
|                                                                                                                                                   | LUL                             | 5.384772572             | 11.9215093  | 1.345805069                    | 1.894535 | 4.22297681              | 12.9647727 | 1.24946422                     | 3.07704654 | 1.98725405              | 3.66242613 | 1.43882192                     | 2.03263242 |
|                                                                                                                                                   | LLL                             | 5.731317342             | 15.50601717 | 1.432416287                    | 2.464176 | 3.44398109              | 10.8039773 | 1.01898053                     | 2.56420545 | 1.98725405              | 3.66242613 | 1.25896918                     | 1.72537403 |
| 7                                                                                                                                                 | RUL                             | 7.544836319             | 13.72034047 | 2.891304038                    | 3.537077 | 4.05897771              | 10.8412324 | 1.20094134                     | 2.57304754 | 1.98725405              | 3.66242613 | 1.70386806                     | 3.0016781  |
|                                                                                                                                                   | LUL                             | 7.049468278             | 13.45043214 | 2.701470945                    | 3.467495 | 3.13971578              | 6.27657323 | 1.19816576                     | 1.55562785 | 1.87110078              | 3.98712383 | 1.79081261                     | 2.3206437  |
| 8                                                                                                                                                 | RUL                             | 5.409333836             | 12.52043519 | 1.388010343                    | 1.621334 | 2.97446758              | 6.87653979 | 1.1351044                      | 1.70432757 | 1.87110078              | 3.98712383 | 1.38879345                     | 2.39771305 |
|                                                                                                                                                   | LLL                             | 5.278673598             | 9.793922084 | 1.354483523                    | 1.268264 | 3.85579131              | 8.16877546 | 1.47143163                     | 2.02460389 | 1.87110078              | 3.98712383 | 1.42534065                     | 2.3206437  |
| 9                                                                                                                                                 | RUL                             | 4.935572787             | 10.6378189  | 1.376513778                    | 1.275758 | 3.45185127              | 7.79956527 | 1.31728165                     | 1.93309637 | 1.87110078              | 3.98712383 | 1.47407024                     | 1.97811327 |
|                                                                                                                                                   | RLL                             | 5.335754364             | 11.08730421 | 1.488123003                    | 1.329663 | 5.18778762              | 9.81753519 | 3.00397814                     | 3.77946757 | 1.10196147              | 3.52202069 | 3.50531972                     | 2.16684449 |



|    |     |                                      |             |             |          |            |            |            |            |            |            |            |            |            |
|----|-----|--------------------------------------|-------------|-------------|----------|------------|------------|------------|------------|------------|------------|------------|------------|------------|
|    | LLL | 6.936480673                          | 14.87047219 | 1.934559904 | 1.783365 | 4.49608261 | 8.11647711 | 2.60344772 | 3.12460933 | 1.10196147 | 3.52202069 | 2.98874628 | 1.77630856 |            |
| 10 | RML | 4.520426488                          | 10.25791396 | 2.051069705 | 2.638895 | 2.73744518 | 6.60620458 | 1.06386455 | 1.25176588 | 1.24265568 | 3.05452265 | 1.76430672 | 2.33434146 |            |
|    | LUL | 4.081299344                          | 9.278942922 | 1.851822934 | 2.38705  | 2.29091157 | 5.32964331 | 0.89032636 | 1.00987876 | 1.24265568 | 3.05452265 | 1.43104879 | 1.76432785 |            |
|    | LLL | 5.631159854                          | 15.87635647 | 2.555046833 | 4.084265 | 4.07566794 | 11.6055494 | 1.21817086 | 1.61116341 | 2.52724263 | 6.28504238 | 1.39104328 | 1.08422616 |            |
| 11 | RUL | 13.26554698                          | 27.02917417 | 2.789810246 | 3.254479 | 4.51565482 | 12.2583615 | 1.34967794 | 1.70179135 | 2.52724263 | 6.28504238 | 1.71779841 | 1.30410419 |            |
|    | RML | 6.893906306                          | 12.4965015  | 1.449822647 | 1.504656 | 5.5114146  | 13.5277185 | 1.64729923 | 1.87801235 | 2.52724263 | 6.28504238 | 1.91385149 | 1.49365421 |            |
|    | RLL | 9.470416744                          | 16.72854354 | 1.991675556 | 2.01422  | 3.93672472 | 11.1340739 | 1.17664231 | 1.5457099  | 2.52724263 | 6.28504238 | 1.29768467 | 1.03494315 |            |
|    | LUL | 9.365963618                          | 20.60126126 | 1.969708546 | 2.480519 | 5.09458493 | 12.2220942 | 1.52271358 | 1.69675647 | 2.52724263 | 6.28504238 | 1.60576808 | 1.35338719 |            |
|    | LLL | 8.216979233                          | 15.5307958  | 1.728071438 | 1.870004 | 5.91264898 | 13.0487629 | 2.54446124 | 3.70166767 | 1.64521978 | 4.34116624 | 1.78385879 | 2.05313375 |            |
| 12 | RUL | 9.653535333                          | 20.4482863  | 3.183644091 | 3.756101 | 5.05531487 | 11.3557272 | 2.17551436 | 3.221388   | 1.64521978 | 4.34116624 | 1.8266714  | 2.09663235 |            |
|    | RML | 5.961169284                          | 10.93366844 | 1.965936904 | 2.008381 | 6.6517301  | 16.0218988 | 2.8625189  | 4.54508562 | 1.64521978 | 4.34116624 | 2.29761012 | 2.45332084 |            |
|    | RLL | 5.071442525                          | 8.653882257 | 1.672513485 | 1.589613 | 3.3176141  | 7.51761926 | 2.41071133 | 2.1790841  | 0.68725643 | 1.57606631 | 3.61316584 | 4.71039972 |            |
|    | LUL | 3.358718514                          | 6.490411693 | 1.107673405 | 1.192209 | 2.84703054 | 6.33627909 | 2.06876646 | 1.8366566  | 0.68725643 | 1.57606631 | 2.3564125  | 2.82623983 |            |
|    | LLL | 4.470876963                          | 8.653882257 | 1.474452678 | 1.589613 | 3.22349739 | 7.01644464 | 2.34232235 | 2.03381183 | 0.68725643 | 1.57606631 | 3.17330217 | 3.48997798 |            |
| 13 | RUL | not available due to dynamic imaging |             |             |          |            | 10.7334511 | 27.5973769 | 2.92971336 | 4.53396979 | 2.30639047 | 6.00683043 | 3.99260191 | 2.8487371  |
|    | RML |                                      |             |             |          |            | 5.56549317 | 14.8813245 | 1.51911063 | 2.44485104 | 2.30639047 | 6.00683043 | 1.58494197 | 1.11981607 |
|    | RLL |                                      |             |             |          |            | 5.59199552 | 11.8893122 | 1.52634449 | 1.95329369 | 2.30639047 | 6.00683043 | 2.06889372 | 1.63052716 |
|    | LUL |                                      |             |             |          |            | 5.45948378 | 11.6137321 | 1.49017519 | 1.90801867 | 2.30639047 | 6.00683043 | 1.59704076 | 1.12918691 |
|    | LLL |                                      |             |             |          |            | 5.88352135 | 14.4089015 | 1.60591695 | 2.36723672 | 2.30639047 | 6.00683043 | 1.70592991 | 1.20415368 |
| 14 | RUL |                                      |             |             |          |            | 2.88450383 | 10.2565275 | 1.21523553 | 2.1646621  | 1.98768803 | 5.43846679 | 1.28169953 | 1.38120667 |
|    | RLL |                                      |             |             |          |            | 2.96644997 | 10.3970279 | 1.24975927 | 2.194315   | 1.98768803 | 5.43846679 | 1.43248771 | 1.44274559 |
|    | LUL |                                      |             |             |          |            | 2.14698865 | 8.25439711 | 0.9045219  | 1.74210819 | 1.98768803 | 5.43846679 | 1.28169953 | 1.38120667 |
|    | LLL |                                      |             |             |          |            | 3.06478532 | 11.0995297 | 1.29118775 | 2.34257953 | 1.98768803 | 5.43846679 | 1.79689248 | 1.91454391 |
| 15 | RUL |                                      |             |             |          |            | 7.75435833 | 12.8538635 | 2.34724603 | 2.39671904 | 2.67409064 | 7.72851975 | 2.5473222  | 1.94894304 |
|    | RML |                                      |             |             |          |            | 4.83507049 | 7.36699043 | 1.46357693 | 1.37364195 | 2.67409064 | 7.72851975 | 1.58624459 | 1.41089128 |
|    | RLL |                                      |             |             |          |            | 4.81226355 | 7.42454504 | 1.45667327 | 1.38437353 | 2.67409064 | 7.72851975 | 1.53959034 | 1.27936752 |
|    | LUL |                                      |             |             |          |            | 3.05612946 | 5.16073027 | 0.92509108 | 0.96226481 | 2.67409064 | 7.72851975 | 1.03572441 | 0.91269521 |
|    | LLL |                                      |             |             |          |            | 3.92279304 | 6.08160408 | 1.18743034 | 1.13397005 | 2.67409064 | 7.72851975 | 1.32498078 | 1.10798807 |

Abbreviations: p.i. = post injection, RUL = right upper lobe, RML = right middle lobe, RLL = right lower lobe, LUL = left upper lobe, LLL = left lower lobe
